# Supplementary material
Source: Springer Nature journal article supplement (https://www.springermedizin.de/resource/supplementary/12885_2011_2742_MOESM3_ESM.pdf/9461848)
Supplement: MOESM3 [file 9461848]

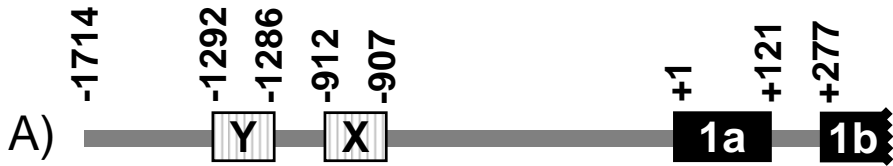

B)

|           |       |                             |                                     |                             |       |
|-----------|-------|-----------------------------|-------------------------------------|-----------------------------|-------|
| Y         | -1303 | AG <b>GGCT</b> GCTA         | GC <b>ACGTT</b> GTC                 | ACC <b>T</b> CGCATT         | -1274 |
| X         | -923  | TT <b>GGCT</b> CTTA         | CC <b>ACTT</b> GTCC                 | CT <b>C</b> AAAACGA         | -894  |
| Consensus |       | ** <b>GGCT</b> ** <b>TA</b> | * <b>CAC</b> * <b>T</b> ** <b>C</b> | ** <b>C</b> ** <b>*****</b> |       |
